# Supplementary material for: ZIKV Demonstrates Minimal Pathologic Effects and Mosquito Infectivity in Viremic Cynomolgus Macaques
Source: Viruses. 2018 Nov 21;10(11):661. doi: 10.3390/v10110661 (PMC6267344; doi:10.3390/v10110661)
Supplement: Supplementary file 1 [file viruses-10-00661-s001.pdf]

Supplementary Figure 1. Serum Biochemistries

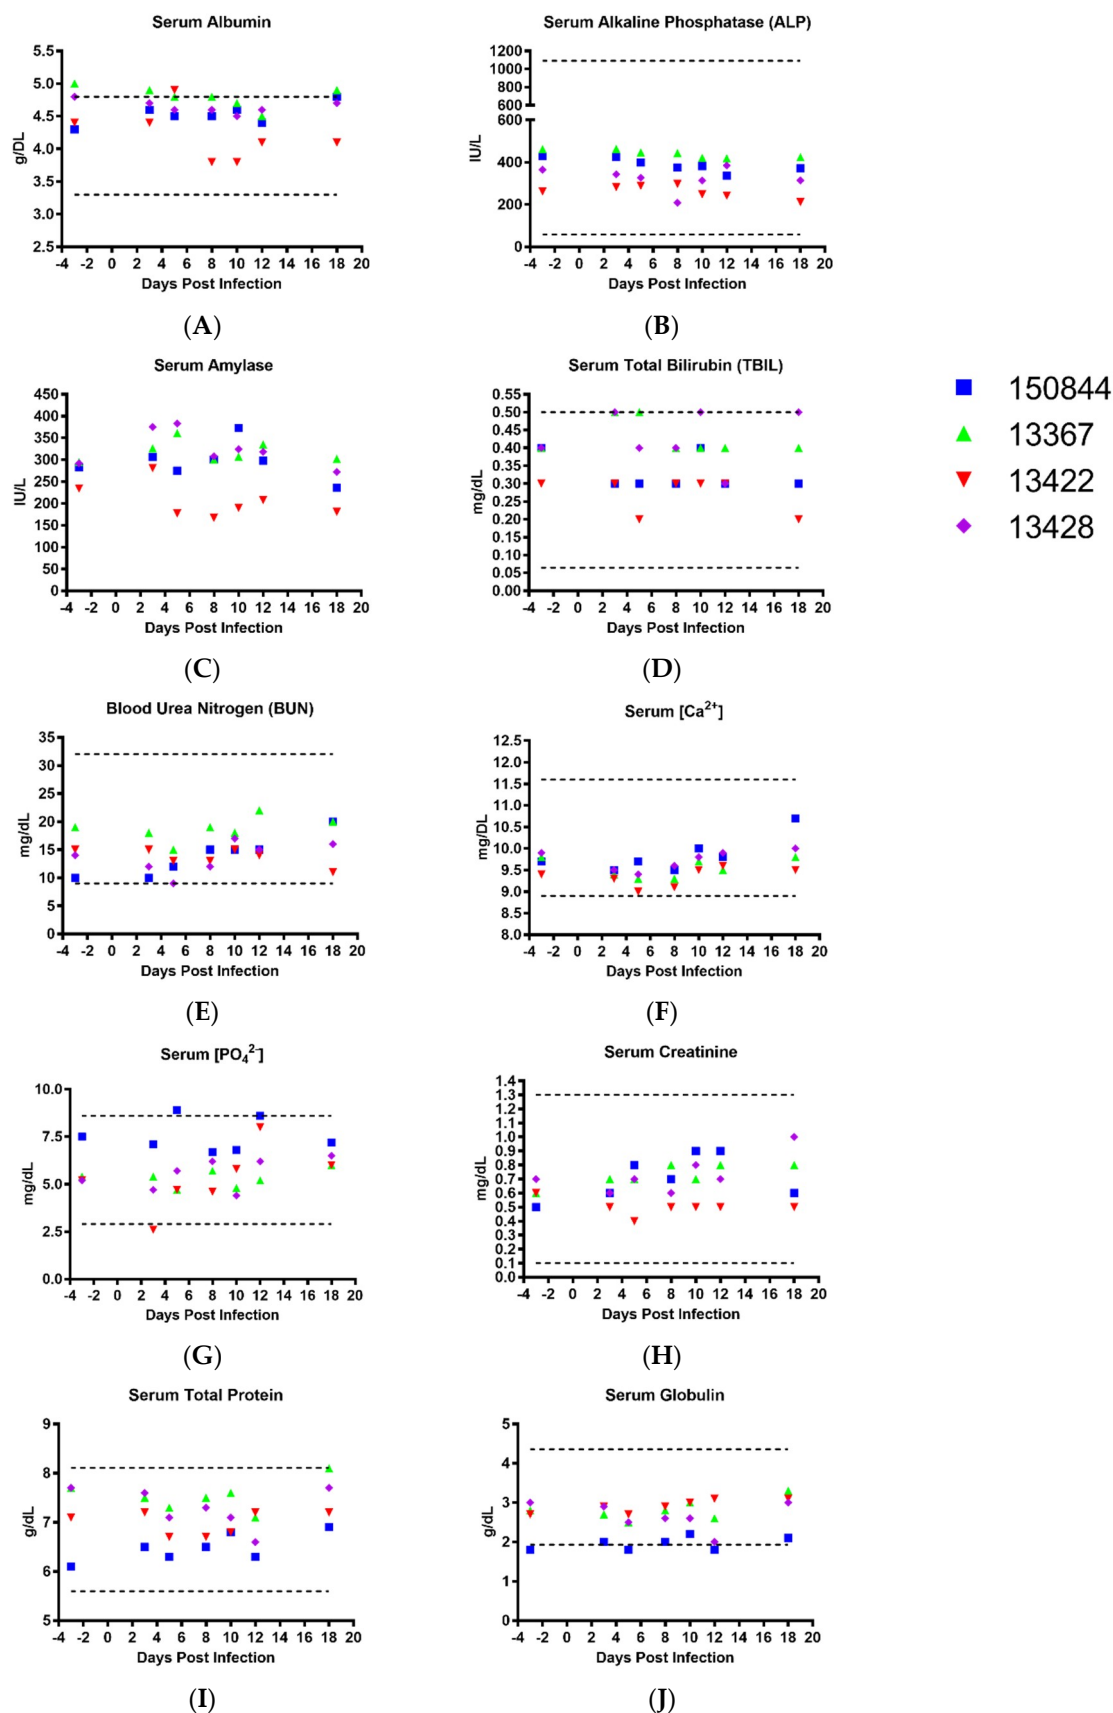

**Figure S1.** Sera was analyzed on Abaxis Comprehensive Diagnostic Profile rotors utilizing the VetScan VS2 system. **A)** serum albumin in g/dL, **B)** serum alkaline phosphatase in IU/L, **C)** serum amylase in IU/L, **D)** total serum bilirubin in md/dL, **E)** Blood urea nitrogen in mg/dL, **F)** serum  $\text{Ca}^{2+}$  in mg/dL, **G)** serum  $\text{PO}_4^{2-}$  in mg/dL, **H)** serum creatine in mg/dL, **I)** total serum protein in g/dL, and **J)** serum globulin in g/dL. Macaque 150844 seen in blue, 13367 in green, 13422 in red and 13428 in purple. Dotted lines represent upper and lower reference ranges for analytes where applicable.

*Supplementary Figure 2. Additional HemaVet Readouts*

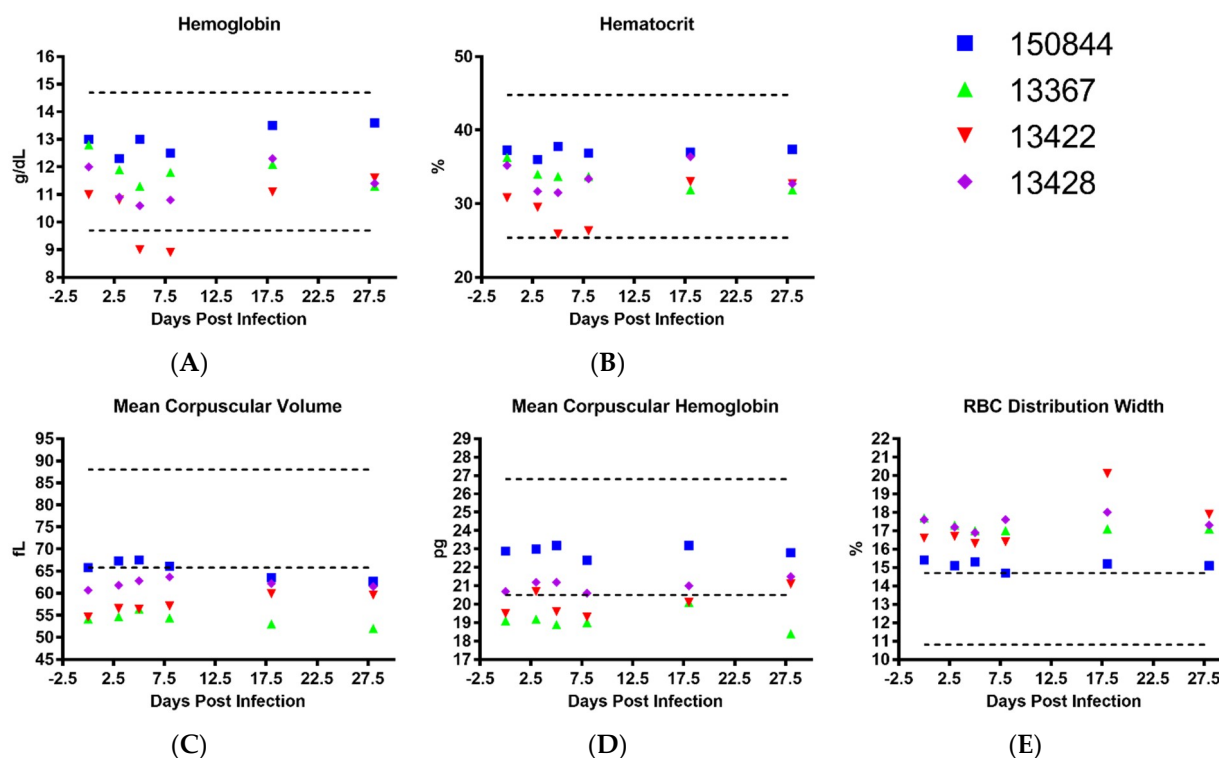

**Figure S2.** Whole blood collected in K<sub>2</sub>EDTA tubes was utilized to perform CBC using the HemaVet 950 system. **A)** hemoglobin in g/dL, **B)** hematocrit (%), **C)** mean corpuscular volume (MCV) in femtoliters (fL), **D)** mean corpuscular hemoglobin in picograms, **E)** RBC distribution width (RDW) as a %. Macaque 150844 seen in blue, 13367 in green, 13422 in red and 13428 in purple. Dotted lines represent upper and lower reference ranges for analytes.
